# Supplementary material for: Airborne Lidar and Machine Learning Reveal Decreased Snow Depth in Burned Forests
Source: Copernicus journal article supplement (doi:10.5194/egusphere-2025-4081), 2025-09-15
Supplement: Supplementary file [file egusphere-2025-4081-AC1-supplement.pdf]

# **Airborne Lidar and Machine Learning Reveal Decreased Snow Depth in Burned Forests**

**Authors:** Arielle Koshkin<sup>1,2\*</sup>, Adrienne Marshall<sup>1</sup>

**Affiliations:**

1. Hydrologic Science and Engineering, Colorado School of Mines, Golden, CO
2. Institute for Arctic and Alpine Research, University of Colorado, Boulder, Boulder, CO

\* Correspondence: [arielle.koshkin@colorado.edu](mailto:arielle.koshkin@colorado.edu)

**Review round:** 1

## **Reviewer 1: Eli Boardman**

### **Summary**

*The authors train machine learning (ML) models to reproduce lidar-based snow depth measurements across a large spatial domain, several years, and different points in the season. Using the trained models, the authors predict the effect of forest fires on snow depth by perturbing the model predictor variables to represent counterfactual burned and unburned conditions. The authors analyze spatial and temporal variability in these model predictions and provide a process-based interpretation of their data-driven findings.*

### **Strengths**

*The fundamental premise of the study is fairly obvious and simple, yet elegant and interesting, which is perhaps the best kind of study. The application of “big data” (>100 lidar surveys) to post-fire snow hydrology is important and novel. This is the kind of paper I would definitely cite in the future, and it provides a clear launching pad for similar future investigations (perhaps comparing additional models, finer resolutions, or other geographic areas). The efforts towards a physical interpretation of ML results is also commendable. The numeric results are interesting both from a basic science standpoint and are directly transferable to water/forest management questions and future model validation applications.*

We're pleased to hear that you found the paper to be important and novel, and we appreciate your thoughtful and thorough review. We've responded to your major and minor comments below, with substantial planned edits to the manuscript to incorporate your suggestions.

### **Main Comments**

#### **(1) Treatment of non-forest alpine areas**

*It is unclear to me how the authors are currently treating the large portions of the study watersheds that are above treeline. In the Sierra Nevada, there are many thousands of km<sup>2</sup> covered by talus and granite bedrock. In these alpine areas, it would be meaningless to talk about the effect of burning a non-existent forest. It seems like the authors may have dealt with this issue by masking out pixels with <10% forest cover, but persistent usage of terminology like “basin-wide” makes this unclear. Additionally, several of the figures clearly show predicted  $\Delta SD$  (snow depth difference in burned forests) across entire basins, even in high alpine regions without forests, which is confusing and physically implausible. I see two possibilities: (A) the current study is masking out the non-forest pixels already, in which case this should be clarified throughout (and the maps should be similarly masked) to avoid confusion, or (B) the current*

*study is predicting  $\Delta$ SD everywhere, even in barren alpine regions, which should be corrected. A related concern is the possibility of pixels that are initially forested and then go to 0% forest cover after a major fire (quite common with the RCMAP dataset used here). How are these pixels handled, and how are newly deforested pixels discriminated from never-forested pixels?*

Thanks for pointing this out; this is an important clarification. In the original analysis,  $\Delta$ SD was predicted across all pixels, including non-forested alpine regions, which could lead to physically implausible interpretations. Following your suggestion, we have revised the analysis to restrict all modeling and predictions to forested areas only. Specifically, we applied a 10–100% tree canopy cover filter using the NLCD Tree Canopy Cover product, which effectively excludes non-forested regions such as talus and exposed bedrock. All models have been retrained using this filtered dataset, and all figures have been updated to mask non-forest pixels so that  $\Delta$ SD is only shown within forested areas. We have also clarified terminology throughout the manuscript, replacing phrases such as “basin-wide” with “basin-wide within forested regions” to avoid confusion. To address the distinction between newly burned and never-forested pixels, the canopy cover filter is based on pre-fire conditions (prior to 2015), ensuring that pixels that were historically forested but later experienced canopy loss due to fire are still included in the analysis, while areas that were never forested are excluded.

## (2) Informal use of “inference” language

*Throughout the manuscript, the authors refer to their methods as “inference,” but the study does not seem to contain any formal inferential framework. I understand that in the machine learning world, “inference” is used equivalently to “prediction.” However, in my view this is an unfortunate artifact of the informal ML lingo that should not be perpetuated in the natural sciences. It seems like the so-called “process-based inference” (Discussion section) is informally derived from the authors’ expert knowledge and literature review rather than quantitative inference. To call something “inference,” I would want to see a quantitative framework defining prior and posterior distributions, a likelihood function, etc. Maybe a compromise would be to call it “process-informed reasoning” or something? Things like Bayesian ML do exist, and should be distinguished from the informal inferential procedure used here (not that informal inference doesn’t have a strong legacy in hydrology...cf. Beven’s GLUE). Specific suggestions for rewording are included in my detailed comments. If the authors want to persist in using “inference,” I think this should be very carefully and explicitly caveated where it appears (Abstract, Methods, Discussion, etc.) to acknowledge that the type of “inference” performed here does not yield statistical confidence intervals, posterior distributions, hypothesis tests, etc. Alternatively, the study could be reworked to leverage the large wealth of hybrid Bayesian-ML*

*approaches, which could enable true inference in a statistical sense, but this would probably require quite a bit of additional work, so it's probably easier to change the language.*

Thanks for this thoughtful comment, and we agree that overall the term “inference” carries a specific meaning in a statistical context that is not fully aligned with how it is sometimes used in machine learning. In response, we have revised the manuscript to avoid potential ambiguity using the term “inference”. We also clarified that our approach does not constitute formal statistical inference but uses predictive modeling to assess changes in snowpack post-fire. While we agree that hybrid Bayesian–ML approaches could enable a more formal inferential framework, implementing such methods is beyond the scope of the present study, which is primarily focused on process interpretation.

### *(3) Spatial autocorrelation and cross-validation*

*The out-of-sample predictive accuracy of the trained model is obviously of paramount importance for this study, since that is how the snow depth difference is calculated. However, the current approach to model validation is potentially impacted by spatial autocorrelation, and a more robust approach to train/test data partitioning would greatly enhance believability. Section 2.3 refers to “cross validation” and “out-of-sample comparison,” but it is unclear how the separate train/test sets are derived for these comparisons. Lacking any specific explanation, I assume that all pixels within a single ASO survey were randomly sampled for training the trees comprising each XGBoost model. However, with 50 m grid cells covering a complete spatial area, most grid cells are adjacent to many other grid cells with near-identical predictors (nearly the same elevation/aspect/slope/forest/fire history). Thus, I wonder whether the model is actually learning meaningful information, or whether it is just interpolating between pixels. For example, if the pixels at  $(x, y-1)$  and  $(x, y+1)$  are in the training dataset, it is quite easy to predict the pixel at  $(x, y)$  in the test dataset through simple spatial interpolation. Thus, I am concerned that the cross-validation error metrics could be confounded by spatial autocorrelation within the gridded snow depth data. The way I have handled similar problems myself is by separating train/test datasets using a large grid, e.g., alternating 1 km blocks of training and test pixels. In the authors' application, the model is asked to predict the effect of hypothetical fires at locations that are many kilometers away from any historical fire location. Thus, the authors should demonstrate that the model is capable of predicting snow depth at a similar distance from the training data, not just the next pixel over. For each ASO survey, I suggest imposing a 1 km (or larger) grid of train/test regions, training the model only within some of these 1 km grid regions, and testing the model predictive accuracy on the other out-of-sample 1 km grid regions. This would provide more of a true out-of-sample estimate of predictive accuracy since snow depth autocorrelation is much lower at kilometer scales compared to 50 m. This would also overcome some of my concerns about using UTM x-y as a predictor variable (namely, that the model can*

*just memorize the snow depth map by interpolating between known training coordinates).*

Thanks for this thoughtful suggestion. We implemented a spatially structured cross-validation approach by partitioning each ASO survey into 1-km grid blocks and assigning entire blocks to either training or testing sets. This ensures that neighboring pixels are not split across datasets, thereby reducing the influence of spatial autocorrelation and providing a more realistic estimate of out-of-sample predictive performance. Under this framework, model performance remained largely consistent and in some cases lower, indicating that the model is not solely relying on local interpolation and retains predictive skill at kilometer-scale distances. As a result, this did not change the overall results of our study but increased the robustness of the model's predictive abilities (see figures below). The lower RMSE of the model could also be attributed to further limiting training and predicted pixels to forested areas. We chose to retain UTM x–y coordinates as predictor variables to capture broad-scale spatial patterns that are not fully explained by the other topographic variables. The spatial blocking approach mitigates the risk that the model is simply memorizing local spatial patterns. In addition, following the reviewer's suggestion below, we incorporated topographic roughness and position metrics into the model to better represent fine-scale terrain influences on snow distribution.

New figures:

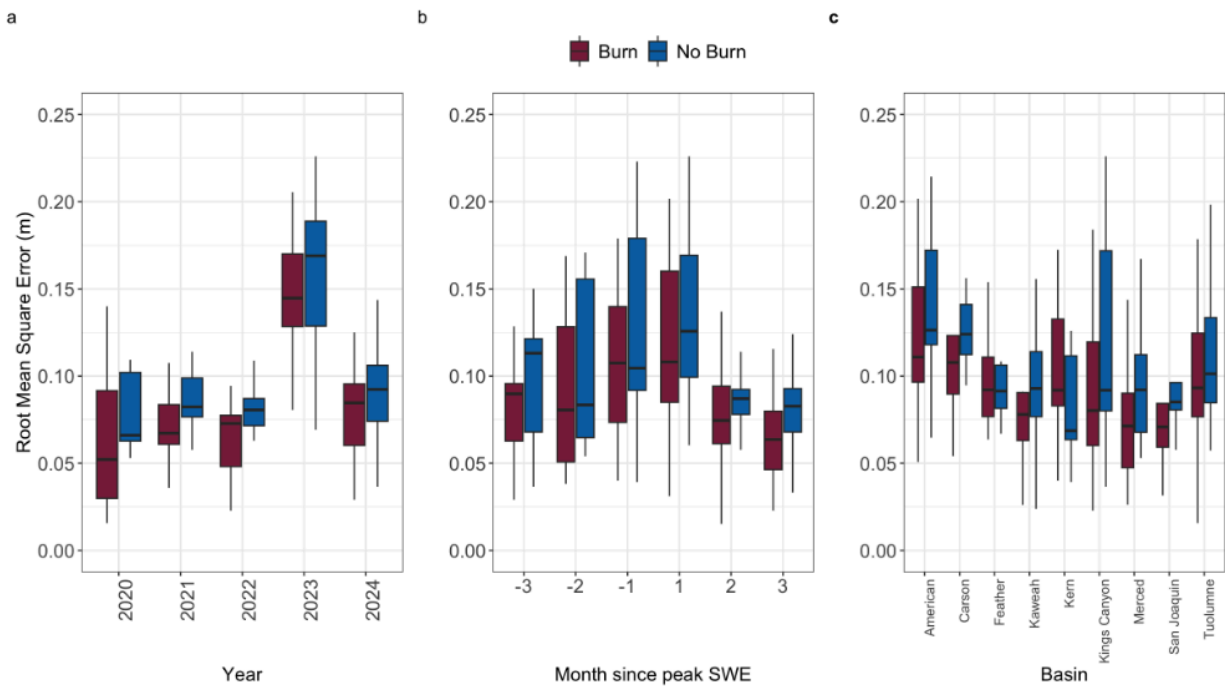

**Figure 2.** Cross validated root mean squared error (CV-RMSE) for burned (red) and unburned (blue) pixels for every acquisition by (a) year of flight, (b) month since peak SWE, and (c) basin.

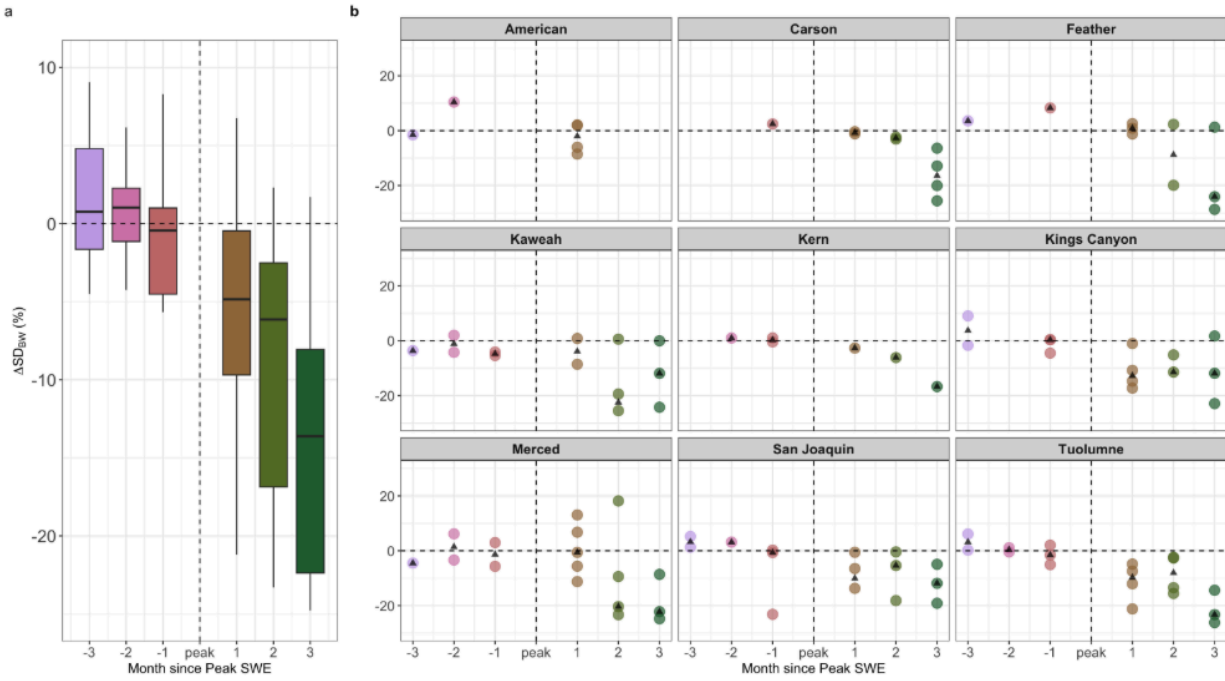

**Figure 3.** (a) Basin-wide average percent difference in snow depth ( $\Delta SD_{BW}$ ) by month relative to peak SWE. (b)  $\Delta SD_{BW}$  by basin and month relative to peak SWE. Each point represents one acquisition. Black triangles are the median  $\Delta SD_{BW}$  for each month since peak SWE for each basin. Negative values on the x-axis indicate acquisitions before peak SWE; positive values indicate acquisitions after. Months are binned in 30-day intervals.

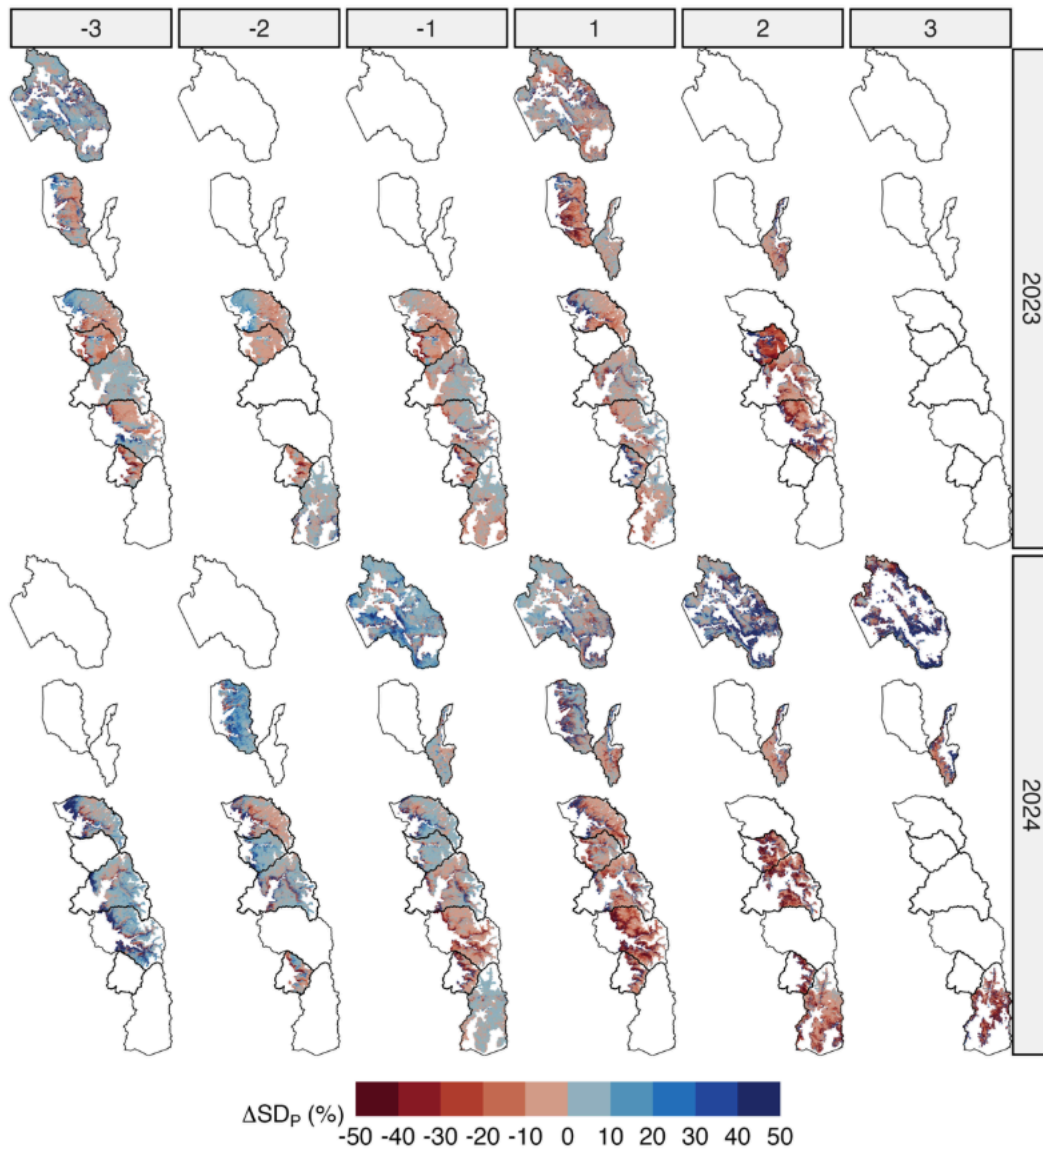

**Figure 4.** Maps of post-fire snow depth percent difference ( $\Delta\text{SD}_p$ ) for water years 2023 and 2024—the years with the most lidar acquisitions—across nine study basins by month since peak SWE. See Figure S4 for maps from other years.

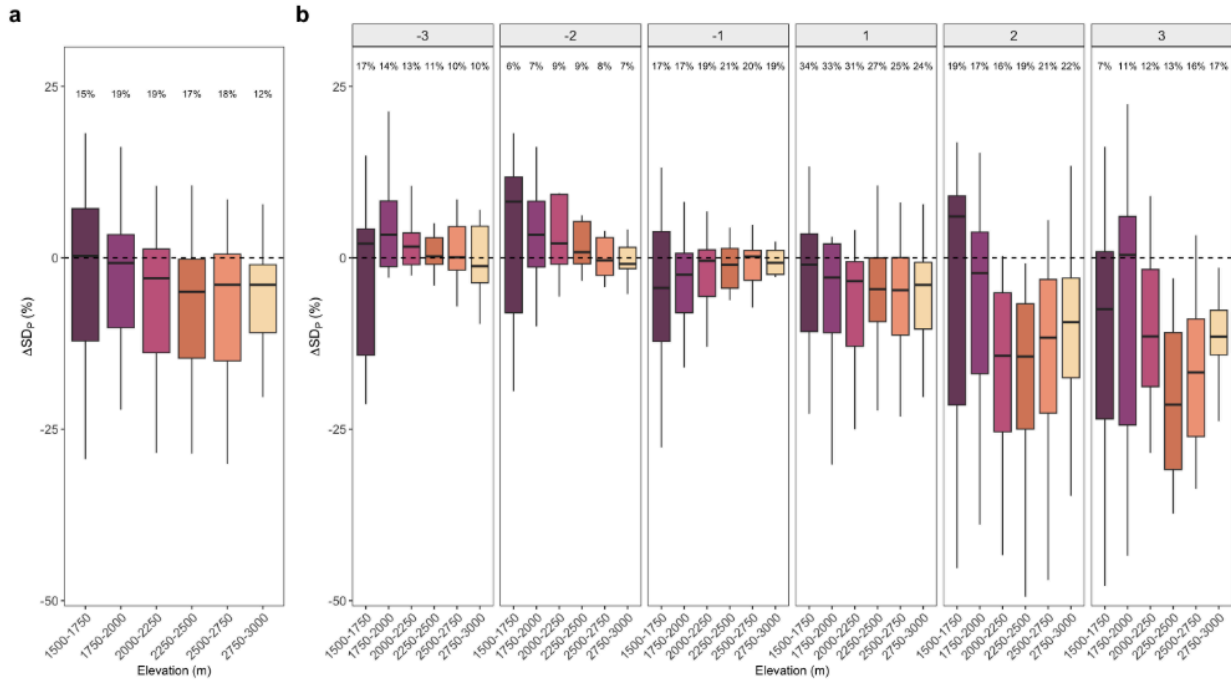

**Figure 5.** (a) Interquartile range of post-fire snow depth percent difference ( $\Delta SD_P$ ) by elevation band across all basins; text denotes fraction of basin area within each elevation band. Black line indicates median. (b) Same as in (a) split out by month since peak SWE.

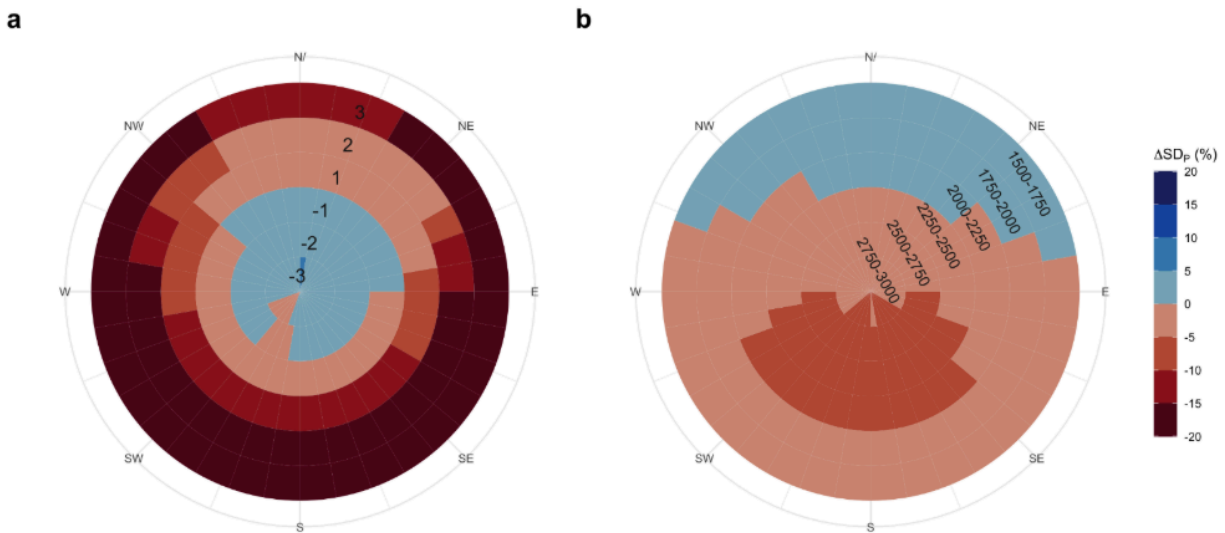

**Figure 6.** Median post-fire snow depth percent difference ( $\Delta SD_P$ ) by aspect. (a)  $\Delta SD_P$  by aspect for each month relative to peak SWE. (b) As in (a), shown by elevation band (m).

## Detailed Comments

*Abstract: “trained on 50-m resolution airborne lidar [snow depth data?]”*

Good catch. We added “snow depth data” on Line 10.

*Abstract: The sentence beginning “During the accumulation season” seems out of place to me—I would expect some broader statement first, like “On average, snow depth is X% lower in burned areas.”*

Good suggestion. We placed, “Across all 115 acquisitions, 44% of accumulation-season acquisitions, while 83 % of ablation-season acquisitions had a lower average predicted snow depth in burned areas compared to unburned areas.” before “During the accumulation season...” to provide broader context.

*Abstract: “basin-wide average predicted snow depth in burned areas” is unclear to me—presumably it’s implausible for the entire basin to burn, since much of it is just alpine rock? Maybe just take out “basin-wide” in the abstract until this can be clarified later.*

Thanks. We removed “basin-wide” from the abstract for clarification.

*Abstract: Sometimes the lower elevations actually have an increase in burned snow depth if I understand correctly? Might be worth adding that to the “smaller, near-zero changes.”*

Thanks. Added “near-zero change” to Line 17.

*Lines 26-27: “long-lasting impacts of large fires on mountainous snowpacks” Maybe add “mountainous snowpacks and snow-dominated water resources” to broaden the implications? We just had a study accepted at HESS might be relevant, which shows that the Creek Fire increased annual San Joaquin runoff by as much as 18% during a drought year, with substantial implications for water management in that basin: Boardman, E. N., Boisramé, G. F. S., Wigmosta, M. S., Shriver, R. K., and Harpold, A. A.: Improving Model Calibrations in a Changing World: Controlling for Nonstationarity After Mega Disturbance Reduces Hydrological Uncertainty, EGU sphere [preprint], <https://doi.org/10.5194/egusphere-2025-1877>, 2025*

Good suggestion. We added “and snow-dominated water resources” to Line 29 and citation for the paper you suggested.

*Line 39: This string of citations seems to have some typographical errors and repeats*

Good catch. Duplicate references were removed.

*Line 81: “relatively accurate” might be an understatement given the nominal snow depth uncertainty of < 1 cm when aggregated to 50 m resolution (cf. ASO survey reports). Also, the observations are at 3 m resolution, which seem to be typically distributed along with the 50 m data in the survey zip folders.*

We included this minor caveat because by necessity, ASO is only evaluated with respect to locations with observed in situ SWE, meaning that errors in the highest elevations and steepest slopes (where minor geolocation errors would be highly consequential) cannot be strictly quantified. We agree that ASO seems to be highly accurate, but feel that a minor qualifier is appropriate given this (unavoidable) limitation to uncertainty quantification. We modified the text to note that observations are at 3 m resolution and aggregated to 50 m data.

*Line 85: Not just the irregular timing of surveys—the interannual weather variability also massively confounds pre/post-fire analyses, which is why counterfactual modeling experiments (as done here with ML, or using process-based models) are the norm for disturbance attribution. Interannual variability in albedo caused by different levels of atmospheric deposition could also be salient for a snow study.*

Added “and interannual weather variability” to the end of the sentence on Line 86-87.

*Line 98: “changes vary” is confusing wording to me—it’s technically correct, and I know what is meant, but maybe consider rewording for clarity?*

The sentence was changed to, “ understand variability in post-wildfire impacts on snowpacks<sup>22</sup> (Line 99).

*Line 107: “five-year study period” is confusing because of the two preceding date ranges—it seems like there are two periods under consideration (2015-2024 and 2020-2024), and it’s not immediately clear how these two periods are being used differently.*

We replaced “5 year study period” with “In the Sierra Nevada, water years 2020-2024” on line 109.

*Figure 1: I think this would be really cool as a multi-panel figure, with a second panel showing the most recent year burned (colors filled within each fire perimeter) and perhaps additional*

panels showing RCMAP forest cover and ASO snow depth (perhaps the maximum pixel-wise snow depth across all acquisitions?)

Thanks for the suggestion. We added percent tree cover from NLCD and max snow depth maps.

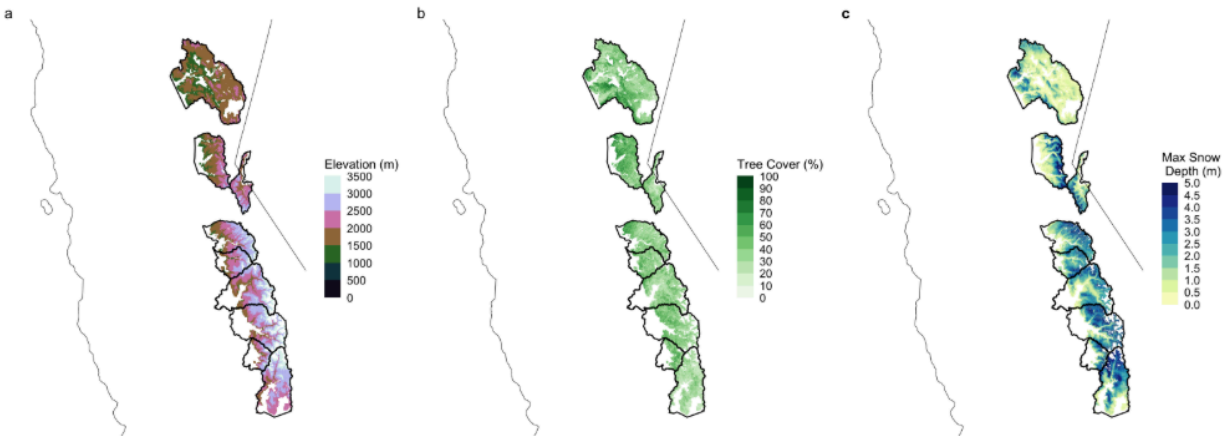

**Figure 1.** Map of (a) elevation, (b) tree cover, and (c) mean snow depth across the Sierra Nevada. The basins shown are the nine basins used in this study based on the criteria stated above.

*Line 121: Some years/basins have even more than 6 flights (2016 in the Tuolumne comes to mind), so perhaps just say “from one to six or more flights per season”*

We added “or more” on Line 128.

*Line 122: The total area of “ $2e17 \text{ km}^2$ ” seems to be a typo, because this is physically implausible. For reference, the land area of Earth is  $1.5e8 \text{ km}^2$ , which is 9 orders of magnitude smaller. Given 115 ASO flights, with a maximum basin area of say  $10,000 \text{ km}^2$  (i.e., the Feather), the total surveyed area cannot be more than  $1e6 \text{ km}^2$ . Similar problem in Table 1: why are the units in  $1015 \text{ km}^2$ ? This is again physically implausible. I would recommend just listing the basin areas in  $\text{km}^2$ , since the area of each basin falls in the range of  $\sim 1,000$  to  $\sim 10,000 \text{ km}^2$ .*

Great catch. Line 122 was updated along with Table 1 with the correct units.

*Line 138 (RCMAP section): I would add a sentence outlining the basic methodology for how Rigge et al. derive these data. Also, be careful of using the year immediately before a fire. I haven't noticed that major fires often show up as “ghosts” in the prior year's dataset (i.e., the September 2020 Creek Fire perimeter is visible in the 2020 RCMAP data as a slight reduction in*

*canopy cover, even though there was no fire effect during the 2020 snow season). They might have fixed this in a later data release—not sure—but definitely worth visually checking some of the immediately pre-fire years. Additionally, I have noticed that the canopy cover in RCMAP is often reduced to 0% or 1% after a major fire—how is this being handled in the >10% masking? Specifically, do pixels that are initially forested and change to 0% tree cover after a fire still get included in the ML training? Are the authors using a static mask across all years (in which case, what years are used to define the 10% threshold?) or are the authors using a dynamic mask for each separate year (in which case, how do newly treeless pixels get handled?)*

Upon investigating the RCMAP dataset further, we do see fires appear ahead of time. As a result, we pivoted to the Forest Service NLCD canopy cover product. See response to major comment 1 for more details on the dataset change.

*Line 145 (Peak SWE section): might be worth checking pairs of ASO flights from before/after SNODAS peak SWE to validate that all of the post-peak-date ASO surveys have less basin-total SWE than the pre-peak-date surveys.*

We decided not to conduct this analysis because ASO flights before peak SWE could very well have less SWE than post-peak ASO flights if substantial snow accumulations occur between the pre-peak flight and the date of peak SWE, or if snowmelt is minimal between peak SWE and the post-peak flight. The determination of peak SWE date is admittedly somewhat uncertain, but based on the way it is used in this analysis, we think minor errors in peak SWE date are unlikely to be impactful to the results. Moreover, recently preprinted work in this journal ([Ritchie et al., 2025](#)) indicates that SNODAS is quite accurate relative to ASO, lending additional confidence to our peak SWE date determination. We added a sentence, “Compared to ASO flights from 2014–2024, SNODAS performed well among SWE products, providing confidence in its ability to capture peak SWE across basins (Richie et al., 2025)” (Line 161-163).

*Section 2.3: A word search doesn't return any results for “counterfactual,” which I think is a key word related to the approach here. Specifically, it would enhance the clarity in my mind if the authors specified that the ML model is used to predict snow depth in counterfactual burned/unburned scenarios, which eliminates the issue of interannual variability for the burn effect attribution. Might also help with future keyword search optimization.*

Thanks for this suggestion. We've made edits throughout to respond. In the abstract, we now use the term “counterfactual” and have edited the text substantially to more clearly introduce our method as a counterfactual approach. We also now use the term “counterfactual” in our

introduction of the approach in the introduction, methods, and discussion. In many cases, we replaced the word “hypothetical” with “counterfactual,” which we agree is more specific.

*Line 161: Using UTM x and y as predictors is potentially problematic. With a large enough model, it could just memorize the snow depth for each unique x-y location. Currently, there seems to be no justification for why these x-y predictors are used, or what the plausible physical interpretation would be. I suspect this is being used to capture synoptic scale weather patterns, i.e., “the north side of the basin gets more snow,” but in that case, why not use climatological maps from PRISM or similar? At minimum, I would like to see some explanation of what these x-y predictors are intended to capture, and a more robust spatial sensitivity test (see major comment on spatial autocorrelation and validation). Ideally, I would like to see if similar results could be reproduced using something other than x-y, such as interpolated climatological maps, or even a smoothing kernel applied to the ASO snow maps (to capture preferential deposition or other weather effects that might be missing from climatological maps).*

Indeed, our aim was to capture synoptic-scale weather patterns that are difficult to observe directly given sparse observational networks. While PRISM and similar datasets might partially capture these, all meteorological data products have known uncertainties and errors. Using x- and y- coordinates as predictors avoids the issue of uncertainties inherent in gridded meteorological products. We think the use of a more robust spatial sensitivity test, as you suggested, avoids the issue of essentially perfect modeling based on x- and y-coordinates alone (see response to your major comment). We also add a brief explanation of the aim of including these x-y coordinates (“using UTM x and y to capture otherwise unobserved synoptic-scale patterns”) (Lines 174-175). We leave the suggestions to explore other alternatives for future work, adding this briefly to the discussion of potential future work: “...suggesting a potential need for future work examining the robustness of our more detailed results to the choice of ML algorithm or input variables.” (Lines 398-399).

*Line 163: is it realistic to treat areas that burned prior to 2015 as unburned, given the (slow?) growth rate of alpine conifer forests? I realize that the albedo effect is probably small after that much time, but I’m not convinced that the interception recovers completely that fast.*

We agree that structural forest attributes such as canopy interception likely require decades to fully recover at high elevations. However, prior work indicates that net wildfire impacts on snowpack diminish to near-zero within 5–10 years, particularly due to recovery of surface energy balance processes. Therefore, we think a 5-year threshold in this study is reasonable. We added,

“given average recovery time at mid-elevations is around 5 years (Koshkin et al., 2025).” on Line 176.

*Line 170: I think the “success” of a given SWE product is subjective and depends on the intended use; I would just take out that word and say “applied to develop a daily SWE product.”*

We removed the word “successfully” on Line 184.

*XGboost section overall: I would like to see some discussion of convolutional neural networks or other SOTA neural approaches to spatial ML like GANs or VAEs. In particular, convolutional nets can use the local spatial context for predictions (i.e., drifts downwind of terrain features, forest edges, gaps, etc.). This is probably less important in forest regions, which tend to have more uniform snowpacks—perhaps this could be stated as a justification for using a simpler treebased approach, combined with the computational efficiency (though backpropagation is also pretty efficient). I’m also curious why the XGBoost prediction features don’t include any topographic metrics beyond elevation/aspect/slope—what about topographic roughness, position index, upwind angle, etc.?*

Per your suggestion, we added topographic roughness and position index calculated from the DEM in the xgboost prediction of snow depth. We also agree that spatially explicit ML approaches could be a valuable next step, so we now mention it briefly in the discussion: “It may be particularly valuable to investigate the impact of spatially-aware ML models (Goel et al., 2022).” (Line 400-401).

*Line 184: “under null conditions to the training data” what does this mean? Even as someone who fancies myself a bit of a ML researcher at times, I’ve never heard this phrase, and I suspect it will be foreign to many non-ML snow scientists too. Please elaborate.*

To make this more clear, we changed null to “baseline” conditions and added (empirically observed) on line 200.

*Line 189: I think this section should be substantially expanded since it gets at the real crux of the whole study—the comparison of counterfactual burned/unburned. Specifically, a few things are unclear to me currently: if this comparison was done “for all pixels,” does this include pixels that have never been forested (above treeline)? If it’s only for the masked pixels with >10% forest cover, see comment on RCMAP pixels that decrease to near 0% after fire. Also, why only set burn severity to high? It seems like for minimal additional effort, the authors could add an*

*additional interesting comparison between the effects of high/medium/low severity and number of years post-fire.*

See response to major comments above about updated methods to filter pixels only to forested areas. Additionally, we chose to focus the analysis of this manuscript on seasonality and topographic factors instead of burn severity. With an initial investigation, we did not see much change in our predicted medium and high burn severity, so we decided to move forward with just the high burn severity scenario. Although we agree that it would be something interesting to further investigate, we ultimately feel it would detract from the results presented and is therefore beyond the scope of this paper.

*Line 199: “basin-wide” is a bit misleading I think, assuming that the comparison is only made within the forested region? Maybe area-average would be a more precise term, or “basin average within the forested region.” Otherwise, I think this carries the implication that a 10% change in post-fire forest snow equates to a 10% change in basin-total snow, which is not true (potentially much of the snow is above treeline in some basins).*

Good suggestion. We added “within the forest region” in our definition of  $SD_{BW}$  on Line 213.

*Line 204: See major comment on spatial cross-validation.*

Thanks for this thoughtful consideration. We changed how we cross-validated the model and added, “To avoid spatial autocorrelation, the test/train datasets were split into 1 km blocks of training and testing pixels, equally sampled between burned and unburned pixels” (line 197-198).

*Figure 2: A lighter shade of green might make these boxes easier to distinguish in black-and white. Also, something is weird with the legend—“Burn” seems to be repeated both sides of the red box.*

Great catch. We deleted “Burn” as the legend header and changed the no burn to blue for better contrast in black and white.

*Figure 3: This is great! My only thought is that “Peak” might be clearer than “pSWE” for the horizontal axes labels.*

Thanks for the suggestion. We updated pSWE to “peak” between numerical values.

*Figures 4 and S4: I don't understand why the  $\Delta SD$  maps extend all the way to the highest reaches of the Tuolumne, Merced, San Joaquin, Kings, etc., which is an extreme alpine area devoid of forest. Are the  $\Delta SD$  values calculated everywhere, or just within the forested region? It wouldn't make sense to talk about the  $\Delta SD$  of these high alpine slopes. If the main  $\Delta SD$  stats in the paper are masked just to the forested region (is this what the 10% canopy cover threshold is for?), this should also be reflected in Figure S4 to avoid confusion.*

We apologize for the confusion. Now that we have set a limit to only forested areas in the predictions, this should be cleared up and Figure 4 and S4 no longer reflect the whole basin.

*Line 273: How many burned forest pixels exist above 3000 m? (Or 3500 m for that matter—Figure 5). Is this a sufficient sample size to justify these comparisons? In the Illilouette, we seem to have an upper fire line around 2600 m. Either way, it would be helpful to know the distribution of burn area training data with elevation.*

We removed the lowest and highest elevations since they had <3% of the total pixels and now break up the elevation bands by 250 m instead of 500. Percentages of pixels by each elevation band are noted in the top of Figure 5a/b.

*Figure 6: It looks like the 0-1500 m elevation range has a positive median  $\Delta SD$  per Figure 5a, but I don't see any positive  $\Delta SD$  for the 0-1500 m range in Figure 6b. Am I misunderstanding something?*

I think this was fixed by removing 0-1500 m as a category since it was such a small percent of the overall dataset. See the comment above for more details.

*Line 320: "variability in these differences varies" awkward wording, how about "these differences vary spatially"*

Thanks for the suggestion. This edited the wording.

*Line 367 / Section 4.2: I'm not sure I would go so far as to call this process-based, when the process implications seem to just be assumed from prior literature. Something more process-based might be calibrating a model like SnowPALM to ASO, then running it in counterfactual burned/unburned scenarios.*

Agreed, this was unclear wording. We edited throughout to avoid the phrase except when referring specifically to process-based (or physically-based) models.

*Line 381: I don't see any inferential statistics. Where is this inference performed, and what are the associated hypothesis tests, likelihood functions, credible intervals, etc.? Not all modeling experiments count as "inference" in my opinion.*

We agree; we originally used the term in this context to convey that we were inferring an effect size from the difference in the burned and unburned predictions. We recognize that this creates conflicts with the meaning of the word "inference" in the formal statistical sense, so we've edited it throughout to avoid it.

*Line 385: I think the choice of "process-based reasoning" (used here) is much more accurate than "process-based inference" (used elsewhere).*

Good suggestion. We replace "process-based inference" with "process-based reasoning" where this language was still present after edits from above.

*Lines 386-392: This comparison of RMSE values is unfair. The other SWE datasets discussed are not directly trained on the target data. In theory, given a large enough model and enough predictors, the approach used here ("predicting" SWE within individual flights) should achieve RMSE  $\sim 0$ , since the true answer is used as the training data.*

Because we still use a calibration/validation approach with testing data withheld, we disagree that the method applied here could reach RMSE  $\sim 0$ . Nonetheless, we agree that the fact that we train on each flight provides an unfair advantage to our method relative to other products. We edited the text to read: "Previous work has assessed error of model products based on SWE, rather than snow depth, and generally targets generalizable predictability across space and time, while we aimed only for predictability within each flight, which is ultimately an easier machine learning task." (Line 408-410).

*Line 393: The authors seem to pose a false dichotomy between "traditional statistical approaches" and "machine learning," when in fact there is a substantial overlap. Relegating "traditional statistics" to just mean "linear regression" ignores a huge body of prior work on advanced nonlinear statistical inference. For instance, Gaussian Process regression is a fully Bayesian ML method that does not require pre-specifying functional forms, most Bayesian sampling algorithms use the same automatic differentiation method that is at the core of all*

*neural networks, etc. Moreover, techniques like variational Bayes can be interpreted equally well using either traditional statistics or machine learning conceptualizations ([https://en.wikipedia.org/wiki/Variational\\_Bayesian\\_methods](https://en.wikipedia.org/wiki/Variational_Bayesian_methods)). I suggest that the authors substantially reword or remove this section in light of the considerable overlap and intermingling between “traditional statistics” and “machine learning,” rather than just dismissing “traditional statistics” as basically antiquated.*

Thanks for pointing this out; we agree that traditional statistics and machine learning exist upon a continuum and did not mean to suggest that classical statistics are antiquated. We’ve edited the paragraph so that it now reads:

“The machine learning approach applied here is functionally an extension of classical statistical methods, with an additional level of flexibility to take advantage of modern large datasets. Classical statistical models, such as linear regression or generalized additive models, require more pre-determined assumptions about data structures and interactions among variables (Wood, 2017). In contrast, XGBoost and other machine learning algorithms can flexibly model nonlinearities and higher-order interactions without pre-specifying functional forms, and are robust to outliers. These strengths are particularly valuable in studies assessing wildfire impacts on snow, where the effects of burn severity, canopy loss, and terrain features on snow depth are spatially heterogeneous and interact in non-linear ways. Using high-resolution ML predictions, we bridge a methodological gap in snow hydrology, allowing for robust assessment of the relative influence of topography, seasonality, and fire on snowpack loss in areas where pre-fire observational data may be unavailable or not comparable to post-fire data. Future work should explore how burn severity impacts post-fire snow loss.” (Lines 416-425).

*Line 404 (Hydrologic impacts section): I would add more references to literature specifically addressing the hydrological impacts of fire in the Sierra Nevada, not just the snow impacts. In addition to our study of the Creek Fire water yield effects cited earlier, here are a few more:*

*Abolafia-Rosenzweig, R., Gochis, D., Schwarz, A., Painter, T.H., Deems, J., Dugger, A., Casali, M. and He, C. (2024), Quantifying the Impacts of Fire-Related Perturbations in WRF-Hydro Terrestrial Water Budget Simulations in California's Feather River Basin. Hydrological Processes, 38: e15314. <https://doi.org/10.1002/hyp.15314>*

*Boisramé, G. F. S., Thompson, S. E., Tague, C., & Stephens, S. L. (2019), Restoring a natural fire regime alters the water balance of a Sierra Nevada catchment. Water Resources Research, 55, 5751–5769. <https://doi.org/10.1029/2018WR024098>*

*Roche JW, Goulden ML, Bales RC. Estimating evapotranspiration change due to forest treatment and fire at the basin scale in the Sierra Nevada, California. Ecohydrology. 2018; 11:e1978. <https://doi.org/10.1002/eco.1978>*

We agree that providing some more context regarding the consequences of fire for hydrology in the Sierra broadly is a useful addition, although, of course, we cannot cover the full scope of literature within the scope of the manuscript. We've added references to the suggested papers in section 4.3, in Line 439.

*Line 407: "entire basin as hypothetically burned" even huge areas of granite talus above treeline?*

We added, "in forested areas" for clarification on Line 424.

*Conclusion: This is a nice concise summary, well done.*

Thanks!
